# Supplementary material
Source: MDPI journal article supplement (https://www.mdpi.com/2073-445X/7/1/2)
Supplement: s1 [file s1]

Archive with 4 entries (4 files):
- Figure S1. LULC Map of ACB in 1985 (a), 1995 (b), and 2010 (c).pdf
- Figure S2. Population density in ACB in 1998 (a) and 2007 (b).docx
- Figure S2. Population density in ACB in 1998 (a) and 2007 (b).pdf
- Figure S1. LULC Map of ACB in 1985 (a), 1995 (b), and 2010 (c).docx
