# Supplementary material
Source: MDPI journal article supplement (https://www.mdpi.com/2073-445X/7/1/2)
Supplement: s1 [file s1 › Figure S1. LULC Map of ACB in 1985 (a), 1995 (b), and 2010 (c).docx]

| 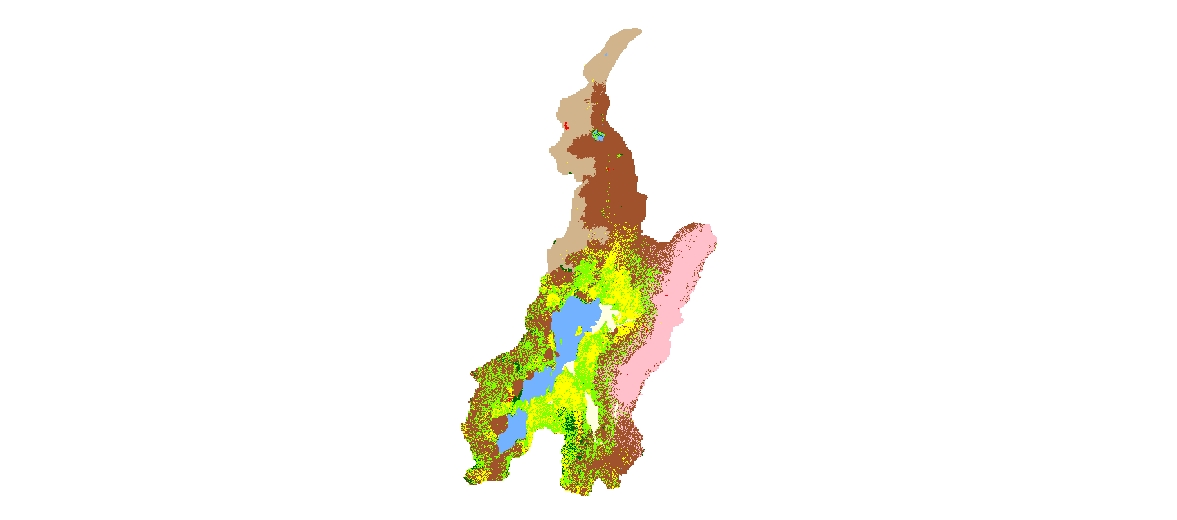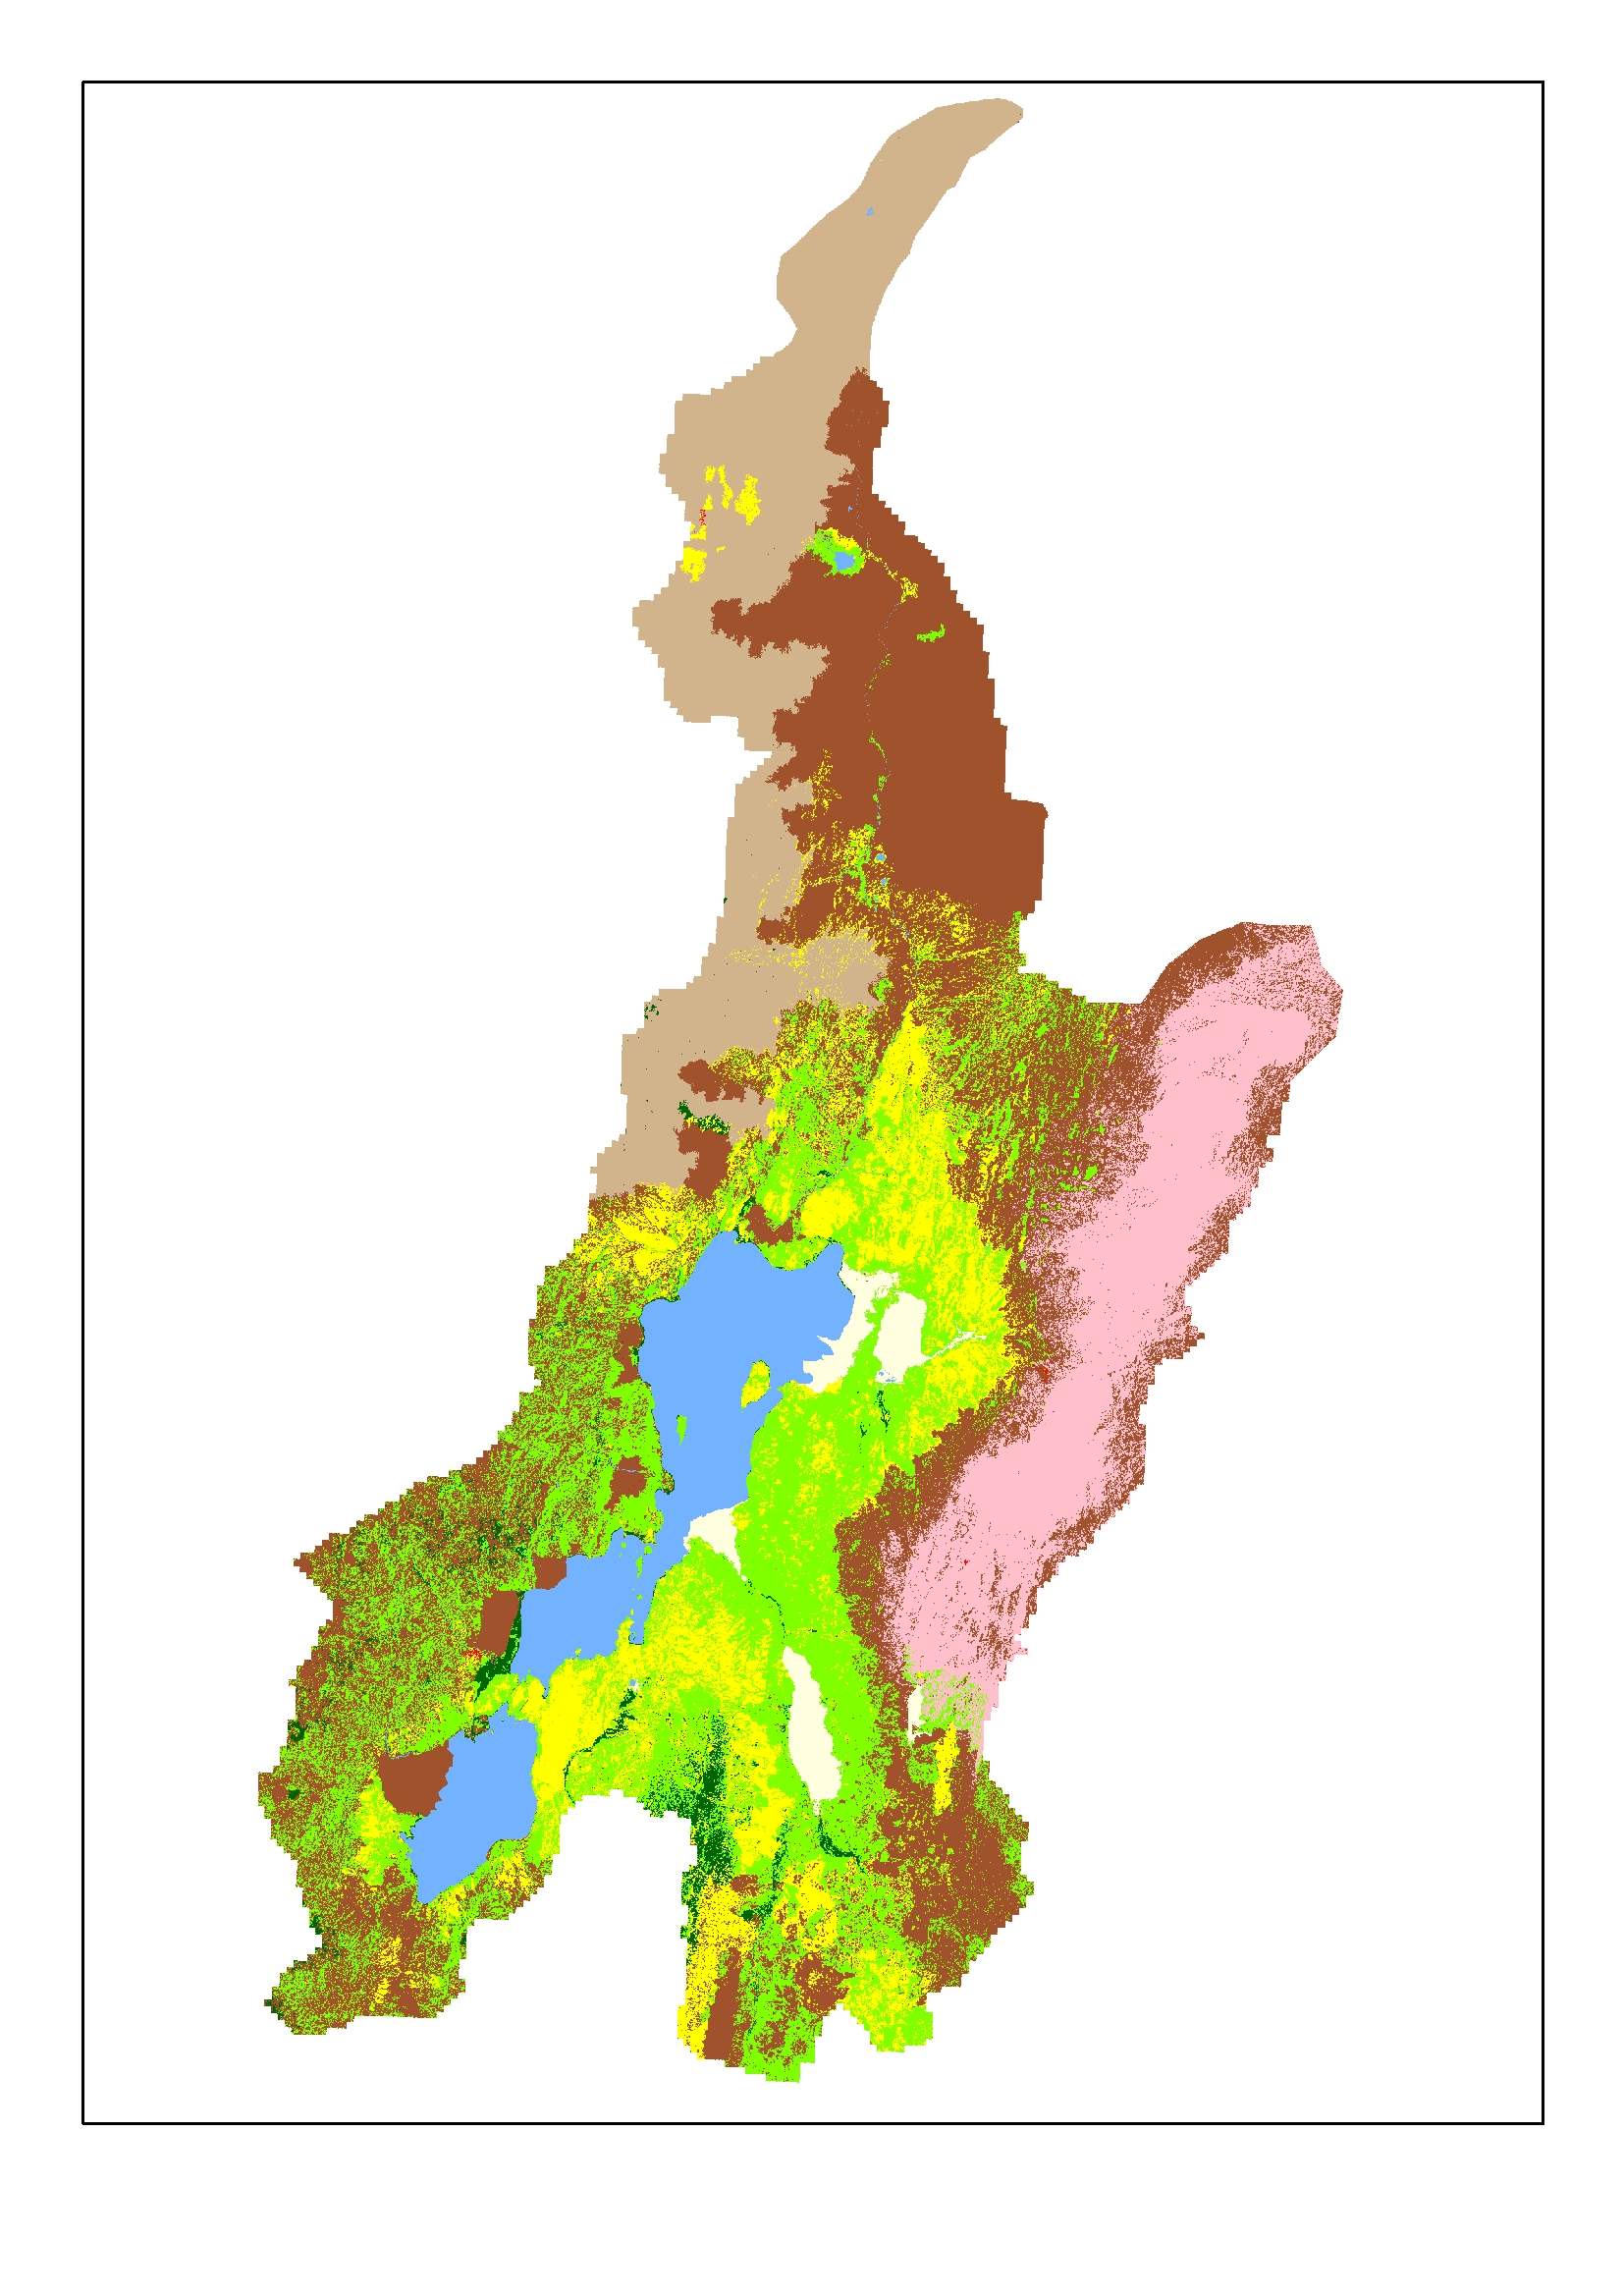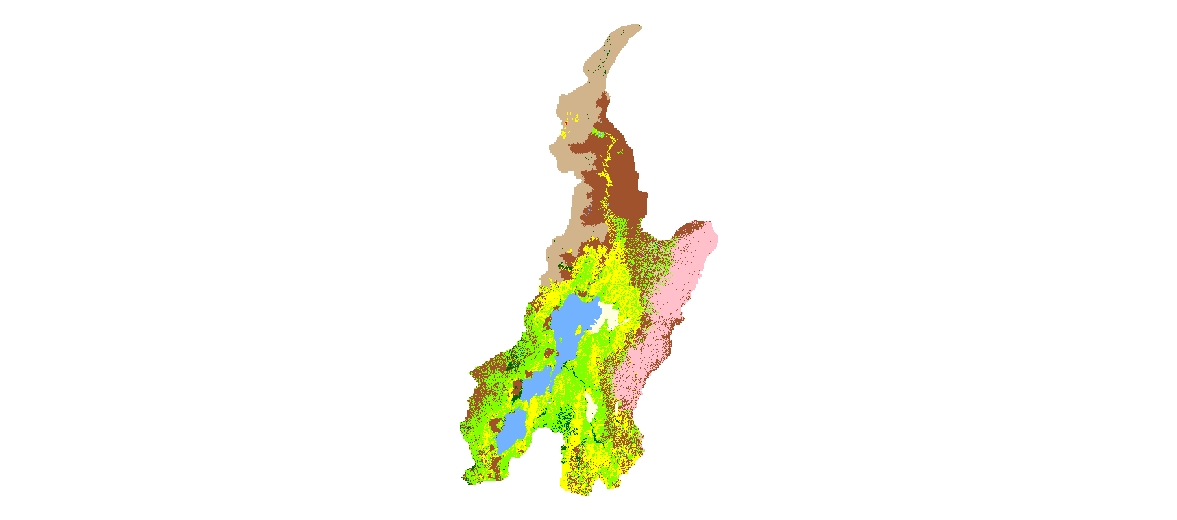   (c)  (b)  (a) |
| --- |
| Forests  Coffee agroforestry  Heterogeneous  agricultural areas  Inland wetlands  Inland waters  Natural grassland  Arable land  Built-up areas  Shrubland |

Figure S1. LULC maps of ACB in 1985 (a), 1995 (b), and 2010 (c)
