# Supplementary material
Source: MDPI journal article supplement (https://www.mdpi.com/2073-445X/7/1/2)
Supplement: s1 [file s1 › Figure S2. Population density in ACB in 1998 (a) and 2007 (b).pdf]

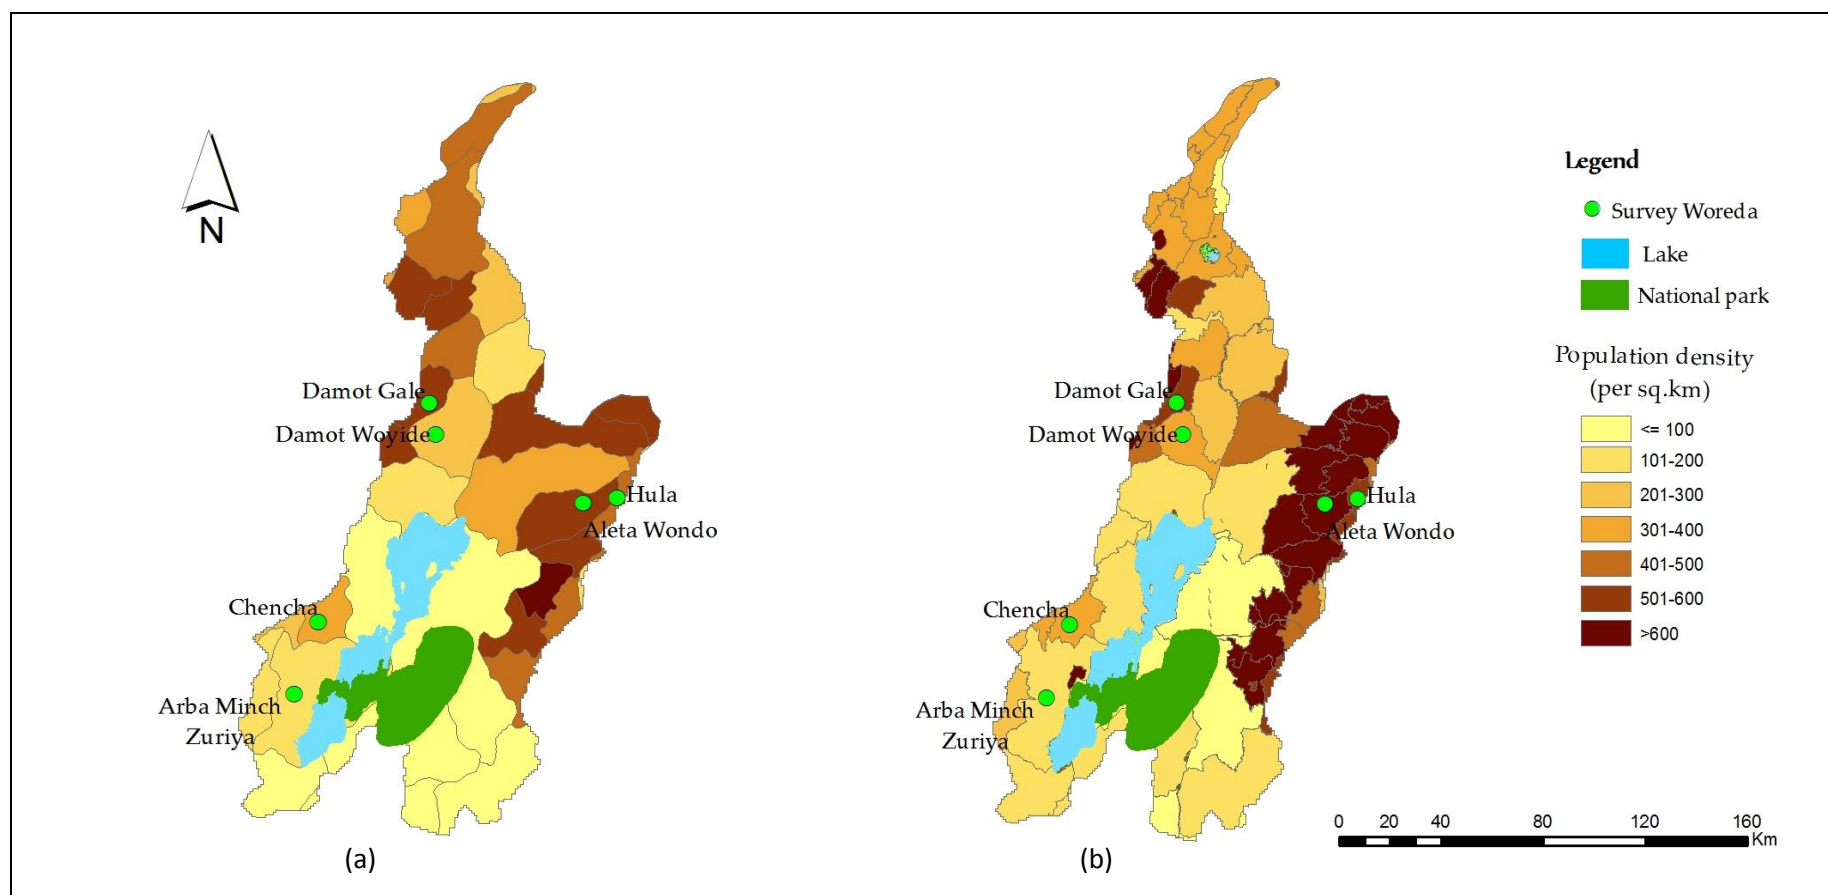

(Source: CSA, 2017)

**Figure S2.** Population density in ACB in 1998 (a) and 2007 (b).

(The first map (a) is based on the 1994, while the second map (b) is based on the 2007 population and housing census of Ethiopia. Both data are presented per sq.km for each Woreda. However, some woredas were divided into two or more woredas in 2007).
