# Supplementary material
Source: MDPI journal article supplement (https://www.mdpi.com/2073-445X/7/1/2)

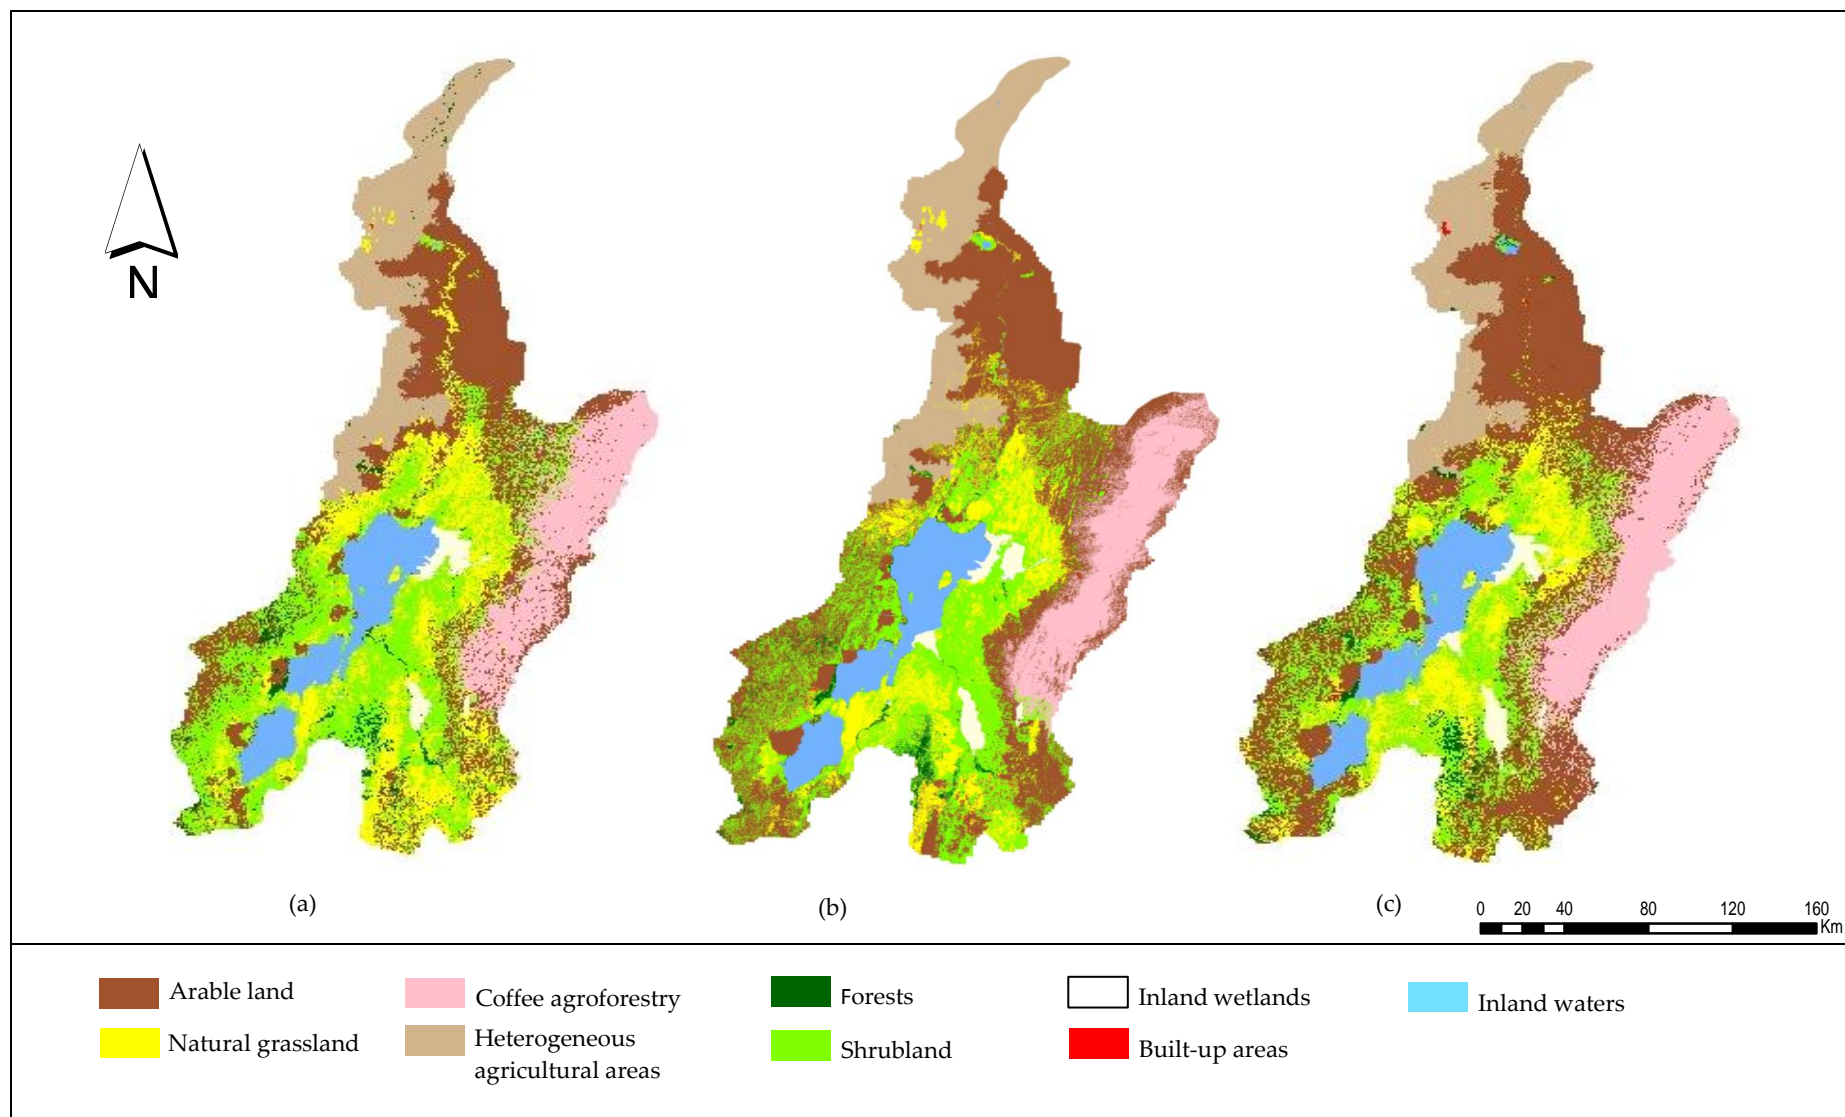

**Figure S1.** LULC maps of ACB in 1985 (a), 1995 (b), and 2010 (c)

Supplement: s1 [file s1 › Figure S1. LULC Map of ACB in 1985 (a), 1995 (b), and 2010 (c).pdf]
